# Supplementary material for: Prospective Genotyping of Hepatocellular Carcinoma: Clinical Implications of Next-Generation Sequencing for Matching Patients to Targeted and Immune Therapies
Source: Oxford University Press journal article supplement (doi:10.1158/1078-0432.ccr-18-2293), 2018-10-29
Supplement: 10780432ccr182293-sup-205450_2_supp_5095903_pgm7rg.xlsx [file 10780432ccr182293-sup-205450_2_supp_5095903_pgm7rg.xlsx]

## Sheet: IMPACT341
Gene_Symbol	HGNC_ID	Description	Location
ABL1	76	c-abl oncogene 1, non-receptor tyrosine kinase	9q34.1
AKT1	391	v-akt murine thymoma viral oncogene homolog 1	14q32.32-q32.33
AKT2	392	v-akt murine thymoma viral oncogene homolog 2	19q13.1-q13.2
AKT3	393	v-akt murine thymoma viral oncogene homolog 3 (protein kinase B, gamma)	1q44
ALK	427	anaplastic lymphoma receptor tyrosine kinase	2p23
ALOX12B	430	arachidonate 12-lipoxygenase, 12R type	17p13.1
APC	583	adenomatous polyposis coli	5q21-q22
AR	644	androgen receptor	Xq12
ARAF	646	v-raf murine sarcoma 3611 viral oncogene homolog	Xp11.3-p11.23
ARID1A	11110	AT rich interactive domain 1A (SWI-like)	1p36.1-p35
ARID1B	18040	AT rich interactive domain 1B (SWI1-like)	6q25.3
ARID2	18037	AT rich interactive domain 2 (ARID, RFX-like)	12q13.11
ARID5B	17362	AT rich interactive domain 5B (MRF1-like)	10q11.22
ASXL1	18318	additional sex combs like 1 (Drosophila)	20q11
ASXL2	23805	additional sex combs like 2 (Drosophila)	2p24.1
ATM	795	ataxia telangiectasia mutated	11q22-q23
ATR	882	ataxia telangiectasia and Rad3 related	3q22-q24
ATRX	886	alpha thalassemia/mental retardation syndrome X-linked	Xq21.1
AURKA	11393	aurora kinase A	20q13
AURKB	11390	aurora kinase B	17p13.1
AXIN1	903	axin 1	16p13.3
AXIN2	904	axin 2	17q23-q24
AXL	905	AXL receptor tyrosine kinase	19q13.1
B2M	914	beta-2-microglobulin	15q21-q22.2
BAP1	950	BRCA1 associated protein-1 (ubiquitin carboxy-terminal hydrolase)	3p21.31-p21.2
BARD1	952	BRCA1 associated RING domain 1	2q34-q35
BBC3	17868	BCL2 binding component 3	19q13.3-q13.4
BCL2	990	B-cell CLL/lymphoma 2	18q21.3
BCL2L1	992	BCL2-like 1	20q11.21
BCL2L11	994	BCL2-like 11 (apoptosis facilitator)	2q13
BCL6	1001	B-cell CLL/lymphoma 6	3q27
BCOR	20893	BCL6 corepressor	Xp11.4
BLM	1058	Bloom syndrome, RecQ helicase-like	15q26.1
BMPR1A	1076	bone morphogenetic protein receptor, type IA	10q22.3
BRAF	1097	v-raf murine sarcoma viral oncogene homolog B1	7q34
BRCA1	1100	breast cancer 1, early onset	17q21-q24
BRCA2	1101	breast cancer 2, early onset	13q12-q13
BRD4	13575	bromodomain containing 4	19
BRIP1	20473	BRCA1 interacting protein C-terminal helicase 1	17q22.2
BTK	1133	Bruton agammaglobulinemia tyrosine kinase	Xq21.33-q22
CARD11	16393	caspase recruitment domain family, member 11	7p22
CASP8	1509	caspase 8, apoptosis-related cysteine peptidase	2q33-q34
CBFB	1539	core-binding factor, beta subunit	16q22.1
CBL	1541	Cas-Br-M (murine) ecotropic retroviral transforming sequence	11q23.3-qter
CCND1	1582	cyclin D1	11q13
CCND2	1583	cyclin D2	12p13
CCND3	1585	cyclin D3	6p21
CCNE1	1589	cyclin E1	19q12
CD274	17635	CD274 molecule	9p24.1
CD276	19137	CD276 molecule	15q23-q24
CD79B	1699	CD79b molecule, immunoglobulin-associated beta	17q23
CDC73	16783	cell division cycle 73, Paf1/RNA polymerase II complex component, homolog (S. cerevisiae)	1q25
CDH1	1748	cadherin 1, type 1, E-cadherin (epithelial)	16q22.1
CDK12	24224	cyclin-dependent kinase 12	17q12
CDK4	1773	cyclin-dependent kinase 4	12q13
CDK6	1777	cyclin-dependent kinase 6	7q21-q22
CDK8	1779	cyclin-dependent kinase 8	13q12
CDKN1A	1784	cyclin-dependent kinase inhibitor 1A (p21, Cip1)	6p21.1
CDKN1B	1785	cyclin-dependent kinase inhibitor 1B (p27, Kip1)	12p13.1-p12
CDKN2A	1787	cyclin-dependent kinase inhibitor 2A (melanoma, p16, inhibits CDK4)	9p21
CDKN2B	1788	cyclin-dependent kinase inhibitor 2B (p15, inhibits CDK4)	9p21
CDKN2C	1789	cyclin-dependent kinase inhibitor 2C (p18, inhibits CDK4)	1p32.3
CHEK1	1925	CHK1 checkpoint homolog (S. pombe)	11q24.2
CHEK2	16627	CHK2 checkpoint homolog (S. pombe)	22q12.1
CIC	14214	capicua homolog (Drosophila)	19q13.2
CREBBP	2348	CREB binding protein	16p13.3
CRKL	2363	v-crk sarcoma virus CT10 oncogene homolog (avian)-like	22q11.21
CRLF2	14281	cytokine receptor-like factor 2	Xp22.3 and Yp11.3
CSF1R	2433	colony stimulating factor 1 receptor	5q32
CTCF	13723	CCCTC-binding factor (zinc finger protein)	16q21-q22.3
CTLA4	2505	cytotoxic T-lymphocyte-associated protein 4	2q33
CTNNB1	2514	catenin (cadherin-associated protein), beta 1, 88kDa	3p21
CUL3	2553	cullin 3	2q36.2
DAXX	2681	death-domain associated protein	6p21.3
DCUN1D1	18184	DCN1, defective in cullin neddylation 1, domain containing 1 (S. cerevisiae)	3q26.3
DDR2	2731	discoidin domain receptor tyrosine kinase 2	1q12-q23
DICER1	17098	dicer 1, ribonuclease type III	14q32.2
DIS3	20604	DIS3 mitotic control homolog (S. cerevisiae)	13q21.32
DNMT1	2976	DNA (cytosine-5-)-methyltransferase 1	19p13.2
DNMT3A	2978	DNA (cytosine-5-)-methyltransferase 3 alpha	2p23
DNMT3B	2979	DNA (cytosine-5-)-methyltransferase 3 beta	20q11.2
DOT1L	24948	DOT1-like, histone H3 methyltransferase (S. cerevisiae)	19p13.3
E2F3	3115	E2F transcription factor 3	6p22
EED	3188	embryonic ectoderm development	11q14.2-q22.3
EGFL7	20594	EGF-like-domain, multiple 7	9q34.3
EGFR	3236	epidermal growth factor receptor	7p12
EIF1AX	3250	eukaryotic translation initiation factor 1A, X-linked	Xp22.13
EP300	3373	E1A binding protein p300	22q13.2
EPCAM	11529	epithelial cell adhesion molecule	2p21
EPHA3	3387	EPH receptor A3	3p11.2
EPHA5	3389	EPH receptor A5	4q13.1
EPHB1	3392	EPH receptor B1	3q21-q23
ERBB2	3430	v-erb-b2 erythroblastic leukemia viral oncogene homolog 2, neuro/glioblastoma derived oncogene homolog (avian)	17q11.2-q12
ERBB3	3431	v-erb-b2 erythroblastic leukemia viral oncogene homolog 3 (avian)	12q13
ERBB4	3432	v-erb-a erythroblastic leukemia viral oncogene homolog 4 (avian)	2q33.3-q34
ERCC2	3434	excision repair cross-complementing rodent repair deficiency, complementation group 2	19q13.3
ERCC3	3435	excision repair cross-complementing rodent repair deficiency, complementation group 3 (xeroderma pigmentosum group B complementing)	2q21
ERCC4	3436	excision repair cross-complementing rodent repair deficiency, complementation group 4	16p13.3
ERCC5	3437	excision repair cross-complementing rodent repair deficiency, complementation group 5	13q22-q34
ERG	3446	v-ets erythroblastosis virus E26 oncogene homolog (avian)	21q22.3
ESR1	3467	estrogen receptor 1	6q24-q27
ETV1	3490	ets variant 1	7p22
ETV6	3495	ets variant 6	12p13
EZH2	3527	enhancer of zeste homolog 2 (Drosophila)	7q35-q36
FAM123B	26837	family with sequence similarity 123B	Xq11.1
FAM175A	25829	family with sequence similarity 175, member A	4q21.23
FANCA	3582	Fanconi anemia, complementation group A	16q24.3
FANCC	3584	Fanconi anemia, complementation group C	9q22.3
FAT1	3595	FAT tumor suppressor homolog 1 (Drosophila)	4q35.2
FBXW7	16712	F-box and WD repeat domain containing 7	4q31.23
FGF19	3675	fibroblast growth factor 19	11q13.1
FGF3	3681	fibroblast growth factor 3	11q13
FGF4	3682	fibroblast growth factor 4	11q13.3
FGFR1	3688	fibroblast growth factor receptor 1	8p12
FGFR2	3689	fibroblast growth factor receptor 2	10q25.3-q26
FGFR3	3690	fibroblast growth factor receptor 3	4p16.3
FGFR4	3691	fibroblast growth factor receptor 4	5q33-qter
FH	3700	fumarate hydratase	1q42.1
FLCN	27310	folliculin	17p11.2
FLT1	3763	fms-related tyrosine kinase 1 (vascular endothelial growth factor/vascular permeability factor receptor)	13q12
FLT3	3765	fms-related tyrosine kinase 3	13q12
FLT4	3767	fms-related tyrosine kinase 4	5q34-q35
FOXA1	5021	forkhead box A1	14q12-q13
FOXL2	1092	forkhead box L2	3q23
FOXP1	3823	forkhead box P1	3p14.1
FUBP1	4004	far upstream element (FUSE) binding protein 1	1p31.1
GATA1	4170	GATA binding protein 1 (globin transcription factor 1)	Xp11.23
GATA2	4171	GATA binding protein 2	3q21
GATA3	4172	GATA binding protein 3	10p15
GNA11	4379	guanine nucleotide binding protein (G protein), alpha 11 (Gq class)	19p13.3
GNAQ	4390	guanine nucleotide binding protein (G protein), q polypeptide	9q21
GNAS	4392	GNAS complex locus	20q13.2-q13.3
GREM1	2001	gremlin 1	15q13.3
GRIN2A	4585	glutamate receptor, ionotropic, N-methyl D-aspartate 2A	16p13.2
GSK3B	4617	glycogen synthase kinase 3 beta	3q13.3
H3F3C	33164	H3 histone, family 3C	12p11.21
HGF	4893	hepatocyte growth factor (hepapoietin A; scatter factor)	7q21.1
HIST1H1C	4716	histone cluster 1, H1c	6p21.3
HIST1H2BD	4747	histone cluster 1, H2bd	6p22.1
HIST1H3B	4776	histone cluster 1, H3b	6p22.1
HNF1A	11621	HNF1 homeobox A	12q24.31
HRAS	5173	v-Ha-ras Harvey rat sarcoma viral oncogene homolog	11p15.5
ICOSLG	17087	inducible T-cell co-stimulator ligand	21q22.3
IDH1	5382	isocitrate dehydrogenase 1 (NADP+), soluble	2q32-qter
IDH2	5383	isocitrate dehydrogenase 2 (NADP+), mitochondrial	15q21-qter
IFNGR1	5439	interferon gamma receptor 1	6q23-q24
IGF1	5464	insulin-like growth factor 1 (somatomedin C)	12q23.2
IGF1R	5465	insulin-like growth factor 1 receptor	15q26.3
IGF2	5466	insulin-like growth factor 2 (somatomedin A)	11p15.5
IKBKE	14552	inhibitor of kappa light polypeptide gene enhancer in B-cells, kinase epsilon	1q31
IKZF1	13176	IKAROS family zinc finger 1 (Ikaros)	7pter-7qter
IL10	5962	interleukin 10	1q31-q32
IL7R	6024	interleukin 7 receptor	5p13
INPP4A	6074	inositol polyphosphate-4-phosphatase, type I, 107kDa	2q11.2
INPP4B	6075	inositol polyphosphate-4-phosphatase, type II, 105kDa	4q31.1
INSR	6091	insulin receptor	19p13.3-p13.2
IRF4	6119	interferon regulatory factor 4	6p25-p23
IRS1	6125	insulin receptor substrate 1	2q36
IRS2	6126	insulin receptor substrate 2	13q34
JAK1	6190	Janus kinase 1	1p32.3-p31.3
JAK2	6192	Janus kinase 2	9p24
JAK3	6193	Janus kinase 3	19p13-p12
JUN	6204	jun proto-oncogene	1p32-p31
KDM5A	9886	lysine (K)-specific demethylase 5A	12p11
KDM5C	11114	lysine (K)-specific demethylase 5C	Xp11.22-p11.21
KDM6A	12637	lysine (K)-specific demethylase 6A	Xp11.2
KDR	6307	kinase insert domain receptor (a type III receptor tyrosine kinase)	4q11-q12
KEAP1	23177	kelch-like ECH-associated protein 1	19p13.2
KIT	6342	v-kit Hardy-Zuckerman 4 feline sarcoma viral oncogene homolog	4q11-q12
KLF4	6348	Kruppel-like factor 4 (gut)	9q31
KRAS	6407	v-Ki-ras2 Kirsten rat sarcoma viral oncogene homolog	12p12.1
LATS1	6514	LATS, large tumor suppressor, homolog 1 (Drosophila)	6q25.1
LATS2	6515	LATS, large tumor suppressor, homolog 2 (Drosophila)	13q11-q12
LMO1	6641	LIM domain only 1 (rhombotin 1)	11p15
MAP2K1	6840	mitogen-activated protein kinase kinase 1	15q22.1-q22.33
MAP2K2	6842	mitogen-activated protein kinase kinase 2	19p13.3
MAP2K4	6844	mitogen-activated protein kinase kinase 4	17p11.2
MAP3K1	6848	mitogen-activated protein kinase kinase kinase 1	5q11.2
MAP3K13	6852	mitogen-activated protein kinase kinase kinase 13	3q27
MAPK1	6871	mitogen-activated protein kinase 1	22q11.2
MAX	6913	MYC associated factor X	14q23
MCL1	6943	myeloid cell leukemia sequence 1 (BCL2-related)	1q21
MDC1	21163	mediator of DNA-damage checkpoint 1	6p21.3
MDM2	6973	Mdm2 p53 binding protein homolog (mouse)	12q13-q14
MDM4	6974	Mdm4 p53 binding protein homolog (mouse)	1q32
MED12	11957	mediator complex subunit 12	Xq13
MEF2B	6995	myocyte enhancer factor 2B	19p13.11
MEN1	7010	multiple endocrine neoplasia I	11q13
MET	7029	met proto-oncogene (hepatocyte growth factor receptor)	7q31
MITF	7105	microphthalmia-associated transcription factor	3p14.1-p12.3
MLH1	7127	mutL homolog 1, colon cancer, nonpolyposis type 2 (E. coli)	3p22.3
MLL	7132	myeloid/lymphoid or mixed-lineage leukemia (trithorax homolog, Drosophila)	11q23
MLL2	7133	myeloid/lymphoid or mixed-lineage leukemia 2	12q12-q13
MLL3	13726	myeloid/lymphoid or mixed-lineage leukemia 3	7q36
MPL	7217	myeloproliferative leukemia virus oncogene	1p34
MRE11A	7230	MRE11 meiotic recombination 11 homolog A (S. cerevisiae)	11q21
MSH2	7325	mutS homolog 2, colon cancer, nonpolyposis type 1 (E. coli)	2p21
MSH6	7329	mutS homolog 6 (E. coli)	2p16
MTOR	3942	mechanistic target of rapamycin (serine/threonine kinase)	1p36
MUTYH	7527	mutY homolog (E. coli)	1p34.1
MYC	7553	v-myc myelocytomatosis viral oncogene homolog (avian)	8q24
MYCL1	7555	v-myc myelocytomatosis viral oncogene homolog 1, lung carcinoma derived (avian)	1p34.3
MYCN	7559	v-myc myelocytomatosis viral related oncogene, neuroblastoma derived (avian)	2p24.3
MYD88	7562	myeloid differentiation primary response gene (88)	3p22
MYOD1	7611	myogenic differentiation 1	11p15
NBN	7652	nibrin	8q21-q24
NCOR1	7672	nuclear receptor corepressor 1	17p11.2
NF1	7765	neurofibromin 1	17q11.2
NF2	7773	neurofibromin 2 (merlin)	22q12.2
NFE2L2	7782	nuclear factor (erythroid-derived 2)-like 2	2q31
NKX2-1	11825	NK2 homeobox 1	14q13.3
NKX3-1	7838	NK3 homeobox 1	8p21.2
NOTCH1	7881	notch 1	9q34.3
NOTCH2	7882	notch 2	1p13-p11
NOTCH3	7883	notch 3	19p13.2-p13.1
NOTCH4	7884	notch 4	6p21.3
NPM1	7910	nucleophosmin (nucleolar phosphoprotein B23, numatrin)	5q35.1
NRAS	7989	neuroblastoma RAS viral (v-ras) oncogene homolog	1p13.2
NSD1	14234	nuclear receptor binding SET domain protein 1	5q35
NTRK1	8031	neurotrophic tyrosine kinase, receptor, type 1	1q21-q22
NTRK2	8032	neurotrophic tyrosine kinase, receptor, type 2	9q22.1
NTRK3	8033	neurotrophic tyrosine kinase, receptor, type 3	15q24-q25
PAK1	8590	p21 protein (Cdc42/Rac)-activated kinase 1	11q13-q14
PAK7	15916	p21 protein (Cdc42/Rac)-activated kinase 7	20p12
PALB2	26144	partner and localizer of BRCA2	16p12.1
PARK2	8607	parkinson protein 2, E3 ubiquitin protein ligase (parkin)	6q25.2-q27
PARP1	270	poly (ADP-ribose) polymerase 1	1q41-q42
PAX5	8619	paired box 5	9p13.2
PBRM1	30064	polybromo 1	3p21
PDCD1	8760	programmed cell death 1	2q37.3
PDGFRA	8803	platelet-derived growth factor receptor, alpha polypeptide	4q12
PDGFRB	8804	platelet-derived growth factor receptor, beta polypeptide	5q33.1
PDPK1	8816	3-phosphoinositide dependent protein kinase-1	16p13.3
PHOX2B	9143	paired-like homeobox 2b	4p13
PIK3C2G	8973	phosphoinositide-3-kinase, class 2, gamma polypeptide	12p12
PIK3C3	8974	phosphoinositide-3-kinase, class 3	18q12.3
PIK3CA	8975	phosphoinositide-3-kinase, catalytic, alpha polypeptide	3q26.3
PIK3CB	8976	phosphoinositide-3-kinase, catalytic, beta polypeptide	3q21-qter
PIK3CD	8977	phosphoinositide-3-kinase, catalytic, delta polypeptide	1p36.2
PIK3CG	8978	phosphoinositide-3-kinase, catalytic, gamma polypeptide	7q22
PIK3R1	8979	phosphoinositide-3-kinase, regulatory subunit 1 (alpha)	5q13.1
PIK3R2	8980	phosphoinositide-3-kinase, regulatory subunit 2 (beta)	19q13.2-q13.4
PIK3R3	8981	phosphoinositide-3-kinase, regulatory subunit 3 (gamma)	1p34.1
PIM1	8986	pim-1 oncogene	6p21
PLK2	19699	polo-like kinase 2	5q12.1-q13.2
PMAIP1	9108	phorbol-12-myristate-13-acetate-induced protein 1	18q21.32
PMS1	9121	PMS1 postmeiotic segregation increased 1 (S. cerevisiae)	2q31-q33
PMS2	9122	PMS2 postmeiotic segregation increased 2 (S. cerevisiae)	7p22.1
PNRC1	17278	proline-rich nuclear receptor coactivator 1	6q16.1
POLE	9177	polymerase (DNA directed), epsilon	12q24.3
PPP2R1A	9302	protein phosphatase 2, regulatory subunit A, alpha	19q13
PRDM1	9346	PR domain containing 1, with ZNF domain	6q21
PRKAR1A	9388	protein kinase, cAMP-dependent, regulatory, type I, alpha (tissue specific extinguisher 1)	17q23-q24
PTCH1	9585	patched 1	9q22.1-q31
PTEN	9588	phosphatase and tensin homolog	10q23
PTPN11	9644	protein tyrosine phosphatase, non-receptor type 11	12q24.1
PTPRD	9668	protein tyrosine phosphatase, receptor type, D	9p24.1-p23
PTPRS	9681	protein tyrosine phosphatase, receptor type, S	19p13.3
PTPRT	9682	protein tyrosine phosphatase, receptor type, T	20q12-q13
RAC1	9801	ras-related C3 botulinum toxin substrate 1 (rho family, small GTP binding protein Rac1)	7p22
RAD50	9816	RAD50 homolog (S. cerevisiae)	5q23-q31
RAD51	9817	RAD51 homolog (RecA homolog, E. coli) (S. cerevisiae)	15q15.1
RAD51B	9822	RAD51-like 1 (S. cerevisiae)	14q23-q24.2
RAD51C	9820	RAD51 homolog C (S. cerevisiae)	17q25.1
RAD51D	9823	RAD51-like 3 (S. cerevisiae)	17q11
RAD52	9824	RAD52 homolog (S. cerevisiae)	12p13-p12.2
RAD54L	9826	RAD54-like (S. cerevisiae)	1p32
RAF1	9829	v-raf-1 murine leukemia viral oncogene homolog 1	3p25
RARA	9864	retinoic acid receptor, alpha	17q21.1
RASA1	9871	RAS p21 protein activator (GTPase activating protein) 1	5q13
RB1	9884	retinoblastoma 1	13q14.2
RBM10	9896	RNA binding motif protein 10	Xp11.3
RECQL4	9949	RecQ protein-like 4	8q24.3
REL	9954	v-rel reticuloendotheliosis viral oncogene homolog (avian)	2p13-p12
RET	9967	ret proto-oncogene	10q11.2
RFWD2	17440	ring finger and WD repeat domain 2	1q25.1-q25.2
RHOA	667	ras homolog gene family, member A	3p21.3
RICTOR	28611	RPTOR independent companion of MTOR, complex 2	5p13.1
RIT1	10023	Ras-like without CAAX 1	1q21.2
RNF43	18505	ring finger protein 43	17q23.2
ROS1	10261	c-ros oncogene 1 , receptor tyrosine kinase	6q21-q22
RPS6KA4	10433	ribosomal protein S6 kinase, 90kDa, polypeptide 4	11q11-q13
RPS6KB2	10437	ribosomal protein S6 kinase, 70kDa, polypeptide 2	11q13.1
RPTOR	30287	regulatory associated protein of MTOR, complex 1	17q25.3
RUNX1	10471	runt-related transcription factor 1	21q22.3
RYBP	10480	RING1 and YY1 binding protein	3p14.2
SDHA	10680	succinate dehydrogenase complex, subunit A, flavoprotein (Fp)	5p15
SDHAF2	26034	succinate dehydrogenase complex assembly factor 2	11q12.2
SDHB	10681	succinate dehydrogenase complex, subunit B, iron sulfur (Ip)	1p36.1-p35
SDHC	10682	succinate dehydrogenase complex, subunit C, integral membrane protein, 15kDa	1q21
SDHD	10683	succinate dehydrogenase complex, subunit D, integral membrane protein	11q23
SETD2	18420	SET domain containing 2	3p21.31
SF3B1	10768	splicing factor 3b, subunit 1, 155kDa	2q33.1
SH2D1A	10820	SH2 domain containing 1A	Xq25
SHQ1	25543	SHQ1 homolog (S. cerevisiae)	3p13
SMAD2	6768	SMAD family member 2	18q21
SMAD3	6769	SMAD family member 3	15q21-q22
SMAD4	6770	SMAD family member 4	18q21.1
SMARCA4	11100	SWI/SNF related, matrix associated, actin dependent regulator of chromatin, subfamily a, member 4	19p13.3
SMARCB1	11103	SWI/SNF related, matrix associated, actin dependent regulator of chromatin, subfamily b, member 1	22q11.23
SMARCD1	11106	SWI/SNF related, matrix associated, actin dependent regulator of chromatin, subfamily d, member 1	12q13-q14
SMO	11119	smoothened homolog (Drosophila)	7q32.1
SOCS1	19383	suppressor of cytokine signaling 1	16p13.13
SOX17	18122	SRY (sex determining region Y)-box 17	8q11.23
SOX2	11195	SRY (sex determining region Y)-box 2	3q26.3-q27
SOX9	11204	SRY (sex determining region Y)-box 9	17q23
SPEN	17575	spen homolog, transcriptional regulator (Drosophila)	1p36
SPOP	11254	speckle-type POZ protein	17q21.33
SRC	11283	v-src sarcoma (Schmidt-Ruppin A-2) viral oncogene homolog (avian)	20q12-q13
STAG2	11355	stromal antigen 2	Xq25
STK11	11389	serine/threonine kinase 11	19p13.3
STK40	21373	serine/threonine kinase 40	1p34.3
SUFU	16466	suppressor of fused homolog (Drosophila)	10q24.32
SUZ12	17101	suppressor of zeste 12 homolog (Drosophila)	17q21
SYK	11491	spleen tyrosine kinase	9q22
TBX3	11602	T-box 3	12q24.1
TERT	11730	telomerase reverse transcriptase	5p15.33
TET1	29484	tet oncogene 1	10q21
TET2	25941	tet oncogene family member 2	4q24
TGFBR1	11772	transforming growth factor, beta receptor 1	9q22
TGFBR2	11773	transforming growth factor, beta receptor II (70/80kDa)	3p22
TMEM127	26038	transmembrane protein 127	2q11.2
TMPRSS2	11876	transmembrane protease, serine 2	21q22.3
TNFAIP3	11896	tumor necrosis factor, alpha-induced protein 3	6q23-q25
TNFRSF14	11912	tumor necrosis factor receptor superfamily, member 14 (herpesvirus entry mediator)	1p36.32
TOP1	11986	topoisomerase (DNA) I	20q12-q13.1
TP53	11998	tumor protein p53	17p13.1
TP63	15979	tumor protein p63	3q27-q29
TRAF7	20456	TNF receptor-associated factor 7	16p13.3
TSC1	12362	tuberous sclerosis 1	9q34
TSC2	12363	tuberous sclerosis 2	16p13.3
TSHR	12373	thyroid stimulating hormone receptor	14q24-q31
U2AF1	12453	U2 small nuclear RNA auxiliary factor 1	21q22.3
VHL	12687	von Hippel-Lindau tumor suppressor	3p25.3
VTCN1	28873	V-set domain containing T cell activation inhibitor 1	1p12
WT1	12796	Wilms tumor 1	11p13
XIAP	592	X-linked inhibitor of apoptosis	Xq25
XPO1	12825	exportin 1 (CRM1 homolog, yeast)	2p15
YAP1	16262	Yes-associated protein 1	11q13
YES1	12841	v-yes-1 Yamaguchi sarcoma viral oncogene homolog 1	18p11.31-p11.21

## Sheet: IMPACT410
Gene_Symbol	HGNC_ID	Description	Location
ABL1	76	c-abl oncogene 1, non-receptor tyrosine kinase	9q34.1
ACVR1	171	activin A receptor, type I	2q23-q24
AKT1	391	v-akt murine thymoma viral oncogene homolog 1	14q32.32-q32.33
AKT2	392	v-akt murine thymoma viral oncogene homolog 2	19q13.1-q13.2
AKT3	393	v-akt murine thymoma viral oncogene homolog 3 (protein kinase B, gamma)	1q44
ALK	427	anaplastic lymphoma receptor tyrosine kinase	2p23
ALOX12B	430	arachidonate 12-lipoxygenase, 12R type	17p13.1
ANKRD11	21316	ankyrin repeat domain 11	16q24.3
APC	583	adenomatous polyposis coli	5q21-q22
AR	644	androgen receptor	Xq12
ARAF	646	v-raf murine sarcoma 3611 viral oncogene homolog	Xp11.3-p11.23
ARID1A	11110	AT rich interactive domain 1A (SWI-like)	1p36.1-p35
ARID1B	18040	AT rich interactive domain 1B (SWI1-like)	6q25.3
ARID2	18037	AT rich interactive domain 2 (ARID, RFX-like)	12q13.11
ARID5B	17362	AT rich interactive domain 5B (MRF1-like)	10q11.22
ASXL1	18318	additional sex combs like 1 (Drosophila)	20q11
ASXL2	23805	additional sex combs like 2 (Drosophila)	2p24.1
ATM	795	ataxia telangiectasia mutated	11q22-q23				I
ATR	882	ataxia telangiectasia and Rad3 related	3q22-q24
ATRX	886	alpha thalassemia/mental retardation syndrome X-linked	Xq21.1
AURKA	11393	aurora kinase A	20q13
AURKB	11390	aurora kinase B	17p13.1
AXIN1	903	axin 1	16p13.3
AXIN2	904	axin 2	17q23-q24
AXL	905	AXL receptor tyrosine kinase	19q13.1
B2M	914	beta-2-microglobulin	15q21-q22.2
BAP1	950	BRCA1 associated protein-1 (ubiquitin carboxy-terminal hydrolase)	3p21.31-p21.2
BARD1	952	BRCA1 associated RING domain 1	2q34-q35
BBC3	17868	BCL2 binding component 3	19q13.3-q13.4
BCL10	989	B-cell CLL/lymphoma 10	1p22
BCL2	990	B-cell CLL/lymphoma 2	18q21.3
BCL2L1	992	BCL2-like 1	20q11.21
BCL2L11	994	BCL2-like 11 (apoptosis facilitator)	2q13
BCL6	1001	B-cell CLL/lymphoma 6	3q27
BCOR	20893	BCL6 corepressor	Xp11.4
BIRC3	591	baculoviral IAP repeat-containing 3	11q22
BLM	1058	Bloom syndrome, RecQ helicase-like	15q26.1
BMPR1A	1076	bone morphogenetic protein receptor, type IA	10q22.3
BRAF	1097	v-raf murine sarcoma viral oncogene homolog B1	7q34
BRCA1	1100	breast cancer 1, early onset	17q21-q24
BRCA2	1101	breast cancer 2, early onset	13q12-q13
BRD4	13575	bromodomain containing 4	19
BRIP1	20473	BRCA1 interacting protein C-terminal helicase 1	17q22.2
BTK	1133	Bruton agammaglobulinemia tyrosine kinase	Xq21.33-q22
CALR	1455	calreticulin	19p13.3-p13.2
CARD11	16393	caspase recruitment domain family, member 11	7p22
CASP8	1509	caspase 8, apoptosis-related cysteine peptidase	2q33-q34
CBFB	1539	core-binding factor, beta subunit	16q22.1
CBL	1541	Cas-Br-M (murine) ecotropic retroviral transforming sequence	11q23.3-qter
CCND1	1582	cyclin D1	11q13
CCND2	1583	cyclin D2	12p13
CCND3	1585	cyclin D3	6p21
CCNE1	1589	cyclin E1	19q12
CD274	17635	CD274 molecule	9p24.1
CD276	19137	CD276 molecule	15q23-q24
CD79A	1698	CD79a molecule, immunoglobulin-associated alpha	19q13.2
CD79B	1699	CD79b molecule, immunoglobulin-associated beta	17q23
CDC73	16783	cell division cycle 73, Paf1/RNA polymerase II complex component, homolog (S. cerevisiae)	1q25
CDH1	1748	cadherin 1, type 1, E-cadherin (epithelial)	16q22.1
CDK12	24224	cyclin-dependent kinase 12	17q12
CDK4	1773	cyclin-dependent kinase 4	12q13
CDK6	1777	cyclin-dependent kinase 6	7q21-q22
CDK8	1779	cyclin-dependent kinase 8	13q12
CDKN1A	1784	cyclin-dependent kinase inhibitor 1A (p21, Cip1)	6p21.1
CDKN1B	1785	cyclin-dependent kinase inhibitor 1B (p27, Kip1)	12p13.1-p12
CDKN2A	1787	cyclin-dependent kinase inhibitor 2A (melanoma, p16, inhibits CDK4)	9p21
CDKN2B	1788	cyclin-dependent kinase inhibitor 2B (p15, inhibits CDK4)	9p21
CDKN2C	1789	cyclin-dependent kinase inhibitor 2C (p18, inhibits CDK4)	1p32.3
CEBPA	1833	CCAAT/enhancer binding protein (C/EBP), alpha	19q13.1
CENPA	1851	centromere protein A	2p24-p21
CHEK1	1925	CHK1 checkpoint homolog (S. pombe)	11q24.2
CHEK2	16627	CHK2 checkpoint homolog (S. pombe)	22q12.1
CIC	14214	capicua homolog (Drosophila)	19q13.2
CREBBP	2348	CREB binding protein	16p13.3
CRKL	2363	v-crk sarcoma virus CT10 oncogene homolog (avian)-like	22q11.21
CRLF2	14281	cytokine receptor-like factor 2	Xp22.3 and Yp11.3
CSF1R	2433	colony stimulating factor 1 receptor	5q32
CSF3R	2439	colony stimulating factor 3 receptor (granulocyte)	1p35-p34.3
CTCF	13723	CCCTC-binding factor (zinc finger protein)	16q21-q22.3
CTLA4	2505	cytotoxic T-lymphocyte-associated protein 4	2q33
CTNNB1	2514	catenin (cadherin-associated protein), beta 1, 88kDa	3p21
CUL3	2553	cullin 3	2q36.2
CXCR4	2561	chemokine (C-X-C motif) receptor 4	2q21
DAXX	2681	death-domain associated protein	6p21.3
DCUN1D1	18184	DCN1, defective in cullin neddylation 1, domain containing 1 (S. cerevisiae)	3q26.3
DDR2	2731	discoidin domain receptor tyrosine kinase 2	1q12-q23
DICER1	17098	dicer 1, ribonuclease type III	14q32.2
DIS3	20604	DIS3 mitotic control homolog (S. cerevisiae)	13q21.32
DNAJB1	5270	DnaJ (Hsp40) homolog, subfamily B, member 1	19p13.2
DNMT1	2976	DNA (cytosine-5-)-methyltransferase 1	19p13.2
DNMT3A	2978	DNA (cytosine-5-)-methyltransferase 3 alpha	2p23
DNMT3B	2979	DNA (cytosine-5-)-methyltransferase 3 beta	20q11.2
DOT1L	24948	DOT1-like, histone H3 methyltransferase (S. cerevisiae)	19p13.3
E2F3	3115	E2F transcription factor 3	6p22
EED	3188	embryonic ectoderm development	11q14.2-q22.3
EGFL7	20594	EGF-like-domain, multiple 7	9q34.3
EGFR	3236	epidermal growth factor receptor	7p12
EIF1AX	3250	eukaryotic translation initiation factor 1A, X-linked	Xp22.13
EIF4A2	3284	eukaryotic translation initiation factor 4A2	3q28
EIF4E	3287	eukaryotic translation initiation factor 4E	4q21-q25
EP300	3373	E1A binding protein p300	22q13.2
EPCAM	11529	epithelial cell adhesion molecule	2p21
EPHA3	3387	EPH receptor A3	3p11.2
EPHA5	3389	EPH receptor A5	4q13.1
EPHA7	3390	EPH receptor A7	6q16.3
EPHB1	3392	EPH receptor B1	3q21-q23
ERBB2	3430	v-erb-b2 erythroblastic leukemia viral oncogene homolog 2, neuro/glioblastoma derived oncogene homolog (avian)	17q11.2-q12
ERBB3	3431	v-erb-b2 erythroblastic leukemia viral oncogene homolog 3 (avian)	12q13
ERBB4	3432	v-erb-a erythroblastic leukemia viral oncogene homolog 4 (avian)	2q33.3-q34
ERCC2	3434	excision repair cross-complementing rodent repair deficiency, complementation group 2	19q13.3
ERCC3	3435	excision repair cross-complementing rodent repair deficiency, complementation group 3 (xeroderma pigmentosum group B complementing)	2q21
ERCC4	3436	excision repair cross-complementing rodent repair deficiency, complementation group 4	16p13.3
ERCC5	3437	excision repair cross-complementing rodent repair deficiency, complementation group 5	13q22-q34
ERG	3446	v-ets erythroblastosis virus E26 oncogene homolog (avian)	21q22.3
ERRFI1	18185	ERBB receptor feedback inhibitor 1	1p36.23
ESR1	3467	estrogen receptor 1	6q24-q27
ETV1	3490	ets variant 1	7p22
ETV6	3495	ets variant 6	12p13
EZH2	3527	enhancer of zeste homolog 2 (Drosophila)	7q35-q36
FAM123B	26837	family with sequence similarity 123B	Xq11.1
FAM175A	25829	family with sequence similarity 175, member A	4q21.23
FAM46C	24712	family with sequence similarity 46, member C	1p12
FANCA	3582	Fanconi anemia, complementation group A	16q24.3
FANCC	3584	Fanconi anemia, complementation group C	9q22.3
FAT1	3595	FAT tumor suppressor homolog 1 (Drosophila)	4q35.2
FBXW7	16712	F-box and WD repeat domain containing 7	4q31.23
FGF19	3675	fibroblast growth factor 19	11q13.1
FGF3	3681	fibroblast growth factor 3	11q13
FGF4	3682	fibroblast growth factor 4	11q13.3
FGFR1	3688	fibroblast growth factor receptor 1	8p12
FGFR2	3689	fibroblast growth factor receptor 2	10q25.3-q26
FGFR3	3690	fibroblast growth factor receptor 3	4p16.3
FGFR4	3691	fibroblast growth factor receptor 4	5q33-qter
FH	3700	fumarate hydratase	1q42.1
FLCN	27310	folliculin	17p11.2
FLT1	3763	fms-related tyrosine kinase 1 (vascular endothelial growth factor/vascular permeability factor receptor)	13q12
FLT3	3765	fms-related tyrosine kinase 3	13q12
FLT4	3767	fms-related tyrosine kinase 4	5q34-q35
FOXA1	5021	forkhead box A1	14q12-q13
FOXL2	1092	forkhead box L2	3q23
FOXO1	3819	forkhead box O1	13q14.1
FOXP1	3823	forkhead box P1	3p14.1
FUBP1	4004	far upstream element (FUSE) binding protein 1	1p31.1
FYN	4037	FYN oncogene related to SRC, FGR, YES	6q21
GATA1	4170	GATA binding protein 1 (globin transcription factor 1)	Xp11.23
GATA2	4171	GATA binding protein 2	3q21
GATA3	4172	GATA binding protein 3	10p15
GLI1	4317	GLI family zinc finger 1	12q13.2-q13.3
GNA11	4379	guanine nucleotide binding protein (G protein), alpha 11 (Gq class)	19p13.3
GNAQ	4390	guanine nucleotide binding protein (G protein), q polypeptide	9q21
GNAS	4392	GNAS complex locus	20q13.2-q13.3
GPS2	4550	G protein pathway suppressor 2	17p13.1
GREM1	2001	gremlin 1	15q13.3
GRIN2A	4585	glutamate receptor, ionotropic, N-methyl D-aspartate 2A	16p13.2
GSK3B	4617	glycogen synthase kinase 3 beta	3q13.3
H3F3A	4764	H3 histone, family 3A	1q42.12
H3F3B	4765	H3 histone, family 3B (H3.3B)	17q25.1
H3F3C	33164	H3 histone, family 3C	12p11.21
HGF	4893	hepatocyte growth factor (hepapoietin A; scatter factor)	7q21.1
HIST1H1C	4716	histone cluster 1, H1c	6p21.3
HIST1H2BD	4747	histone cluster 1, H2bd	6p22.1
HIST1H3A	4766	histone cluster 1, H3a	6p22.1
HIST1H3B	4776	histone cluster 1, H3b	6p22.1
HIST1H3C	4768	histone cluster 1, H3c	6p22.1
HIST1H3D	4767	histone cluster 1, H3d	6p22.1
HIST1H3E	4769	histone cluster 1, H3e	6p22.1
HIST1H3F	4773	histone cluster 1, H3f	6p22.1
HIST1H3G	4772	histone cluster 1, H3g	6p22.1
HIST1H3H	4775	histone cluster 1, H3h	6p22.1
HIST1H3I	4771	histone cluster 1, H3i	6p22.1
HIST1H3J	4774	histone cluster 1, H3j	6p22.1
HIST2H3C	20503	histone cluster 2, H3c	1q21.2
HIST2H3D	25311	histone cluster 2, H3d	1q21.2
HIST3H3	4778	histone cluster 3, H3	1q42.13
HLA-A	4931	major histocompatibility complex, class I, A	6p21.3
HNF1A	11621	HNF1 homeobox A	12q24.31
HOXB13	5112	homeobox B13	17q21.32
HRAS	5173	v-Ha-ras Harvey rat sarcoma viral oncogene homolog	11p15.5
ICOSLG	17087	inducible T-cell co-stimulator ligand	21q22.3
ID3	5362	inhibitor of DNA binding 3, dominant negative helix-loop-helix protein	1p36.13-p36.12
IDH1	5382	isocitrate dehydrogenase 1 (NADP+), soluble	2q32-qter
IDH2	5383	isocitrate dehydrogenase 2 (NADP+), mitochondrial	15q21-qter
IFNGR1	5439	interferon gamma receptor 1	6q23-q24
IGF1	5464	insulin-like growth factor 1 (somatomedin C)	12q23.2
IGF1R	5465	insulin-like growth factor 1 receptor	15q26.3
IGF2	5466	insulin-like growth factor 2 (somatomedin A)	11p15.5
IKBKE	14552	inhibitor of kappa light polypeptide gene enhancer in B-cells, kinase epsilon	1q31
IKZF1	13176	IKAROS family zinc finger 1 (Ikaros)	7pter-7qter
IL10	5962	interleukin 10	1q31-q32
IL7R	6024	interleukin 7 receptor	5p13
INHA	6065	inhibin, alpha	2q33-qter
INHBA	6066	inhibin, beta A	7p15-p13
INPP4A	6074	inositol polyphosphate-4-phosphatase, type I, 107kDa	2q11.2
INPP4B	6075	inositol polyphosphate-4-phosphatase, type II, 105kDa	4q31.1
INSR	6091	insulin receptor	19p13.3-p13.2
IRF4	6119	interferon regulatory factor 4	6p25-p23
IRS1	6125	insulin receptor substrate 1	2q36
IRS2	6126	insulin receptor substrate 2	13q34
JAK1	6190	Janus kinase 1	1p32.3-p31.3
JAK2	6192	Janus kinase 2	9p24
JAK3	6193	Janus kinase 3	19p13-p12
JUN	6204	jun proto-oncogene	1p32-p31
KDM5A	9886	lysine (K)-specific demethylase 5A	12p11
KDM5C	11114	lysine (K)-specific demethylase 5C	Xp11.22-p11.21
KDM6A	12637	lysine (K)-specific demethylase 6A	Xp11.2
KDR	6307	kinase insert domain receptor (a type III receptor tyrosine kinase)	4q11-q12
KEAP1	23177	kelch-like ECH-associated protein 1	19p13.2
KIT	6342	v-kit Hardy-Zuckerman 4 feline sarcoma viral oncogene homolog	4q11-q12
KLF4	6348	Kruppel-like factor 4 (gut)	9q31
KRAS	6407	v-Ki-ras2 Kirsten rat sarcoma viral oncogene homolog	12p12.1
LATS1	6514	LATS, large tumor suppressor, homolog 1 (Drosophila)	6q25.1
LATS2	6515	LATS, large tumor suppressor, homolog 2 (Drosophila)	13q11-q12
LMO1	6641	LIM domain only 1 (rhombotin 1)	11p15
MALT1	6819	mucosa associated lymphoid tissue lymphoma translocation gene 1	18q21
MAP2K1	6840	mitogen-activated protein kinase kinase 1	15q22.1-q22.33
MAP2K2	6842	mitogen-activated protein kinase kinase 2	19p13.3
MAP2K4	6844	mitogen-activated protein kinase kinase 4	17p11.2
MAP3K1	6848	mitogen-activated protein kinase kinase kinase 1	5q11.2
MAP3K13	6852	mitogen-activated protein kinase kinase kinase 13	3q27
MAP3K14	6853	mitogen-activated protein kinase kinase kinase 14	17q21-q22
MAPK1	6871	mitogen-activated protein kinase 1	22q11.2
MAPK3	6877	mitogen-activated protein kinase 3	16p11.2
MAX	6913	MYC associated factor X	14q23
MCL1	6943	myeloid cell leukemia sequence 1 (BCL2-related)	1q21
MDC1	21163	mediator of DNA-damage checkpoint 1	6p21.3
MDM2	6973	Mdm2 p53 binding protein homolog (mouse)	12q13-q14
MDM4	6974	Mdm4 p53 binding protein homolog (mouse)	1q32
MED12	11957	mediator complex subunit 12	Xq13
MEF2B	6995	myocyte enhancer factor 2B	19p13.11
MEN1	7010	multiple endocrine neoplasia I	11q13
MET	7029	met proto-oncogene (hepatocyte growth factor receptor)	7q31
MGA	14010	MAX gene associated	15q15
MITF	7105	microphthalmia-associated transcription factor	3p14.1-p12.3
MLH1	7127	mutL homolog 1, colon cancer, nonpolyposis type 2 (E. coli)	3p22.3
MLL	7132	myeloid/lymphoid or mixed-lineage leukemia (trithorax homolog, Drosophila)	11q23
MLL2	7133	myeloid/lymphoid or mixed-lineage leukemia 2	12q12-q13
MLL3	13726	myeloid/lymphoid or mixed-lineage leukemia 3	7q36
MPL	7217	myeloproliferative leukemia virus oncogene	1p34
MRE11A	7230	MRE11 meiotic recombination 11 homolog A (S. cerevisiae)	11q21
MSH2	7325	mutS homolog 2, colon cancer, nonpolyposis type 1 (E. coli)	2p21
MSH6	7329	mutS homolog 6 (E. coli)	2p16
MST1	7380	macrophage stimulating 1 (hepatocyte growth factor-like)	3p21
MST1R	7381	macrophage stimulating 1 receptor (c-met-related tyrosine kinase)	3p21
MTOR	3942	mechanistic target of rapamycin (serine/threonine kinase)	1p36
MUTYH	7527	mutY homolog (E. coli)	1p34.1
MYC	7553	v-myc myelocytomatosis viral oncogene homolog (avian)	8q24
MYCL1	7555	v-myc myelocytomatosis viral oncogene homolog 1, lung carcinoma derived (avian)	1p34.3
MYCN	7559	v-myc myelocytomatosis viral related oncogene, neuroblastoma derived (avian)	2p24.3
MYD88	7562	myeloid differentiation primary response gene (88)	3p22
MYOD1	7611	myogenic differentiation 1	11p15
NBN	7652	nibrin	8q21-q24
NCOA3	7670	nuclear receptor coactivator 3	20q12
NCOR1	7672	nuclear receptor corepressor 1	17p11.2
NEGR1	17302	neuronal growth regulator 1	1p31.1
NF1	7765	neurofibromin 1	17q11.2
NF2	7773	neurofibromin 2 (merlin)	22q12.2
NFE2L2	7782	nuclear factor (erythroid-derived 2)-like 2	2q31
NFKBIA	7797	nuclear factor of kappa light polypeptide gene enhancer in B-cells inhibitor, alpha	14q13
NKX2-1	11825	NK2 homeobox 1	14q13.3
NKX3-1	7838	NK3 homeobox 1	8p21.2
NOTCH1	7881	notch 1	9q34.3
NOTCH2	7882	notch 2	1p13-p11
NOTCH3	7883	notch 3	19p13.2-p13.1
NOTCH4	7884	notch 4	6p21.3
NPM1	7910	nucleophosmin (nucleolar phosphoprotein B23, numatrin)	5q35.1
NRAS	7989	neuroblastoma RAS viral (v-ras) oncogene homolog	1p13.2
NSD1	14234	nuclear receptor binding SET domain protein 1	5q35
NTRK1	8031	neurotrophic tyrosine kinase, receptor, type 1	1q21-q22
NTRK2	8032	neurotrophic tyrosine kinase, receptor, type 2	9q22.1
NTRK3	8033	neurotrophic tyrosine kinase, receptor, type 3	15q24-q25
NUP93	28958	nucleoporin 93kDa	16q13
PAK1	8590	p21 protein (Cdc42/Rac)-activated kinase 1	11q13-q14
PAK7	15916	p21 protein (Cdc42/Rac)-activated kinase 7	20p12
PALB2	26144	partner and localizer of BRCA2	16p12.1
PARK2	8607	parkinson protein 2, E3 ubiquitin protein ligase (parkin)	6q25.2-q27
PARP1	270	poly (ADP-ribose) polymerase 1	1q41-q42
PAX5	8619	paired box 5	9p13.2
PBRM1	30064	polybromo 1	3p21
PDCD1	8760	programmed cell death 1	2q37.3
PDGFRA	8803	platelet-derived growth factor receptor, alpha polypeptide	4q12
PDGFRB	8804	platelet-derived growth factor receptor, beta polypeptide	5q33.1
PDPK1	8816	3-phosphoinositide dependent protein kinase-1	16p13.3
PGR	8910	progesterone receptor	11q22-q23
PHOX2B	9143	paired-like homeobox 2b	4p13
PIK3C2G	8973	phosphoinositide-3-kinase, class 2, gamma polypeptide	12p12
PIK3C3	8974	phosphoinositide-3-kinase, class 3	18q12.3
PIK3CA	8975	phosphoinositide-3-kinase, catalytic, alpha polypeptide	3q26.3
PIK3CB	8976	phosphoinositide-3-kinase, catalytic, beta polypeptide	3q21-qter
PIK3CD	8977	phosphoinositide-3-kinase, catalytic, delta polypeptide	1p36.2
PIK3CG	8978	phosphoinositide-3-kinase, catalytic, gamma polypeptide	7q22
PIK3R1	8979	phosphoinositide-3-kinase, regulatory subunit 1 (alpha)	5q13.1
PIK3R2	8980	phosphoinositide-3-kinase, regulatory subunit 2 (beta)	19q13.2-q13.4
PIK3R3	8981	phosphoinositide-3-kinase, regulatory subunit 3 (gamma)	1p34.1
PIM1	8986	pim-1 oncogene	6p21
PLCG2	9066	phospholipase C, gamma 2 (phosphatidylinositol-specific)	16q24.1
PLK2	19699	polo-like kinase 2	5q12.1-q13.2
PMAIP1	9108	phorbol-12-myristate-13-acetate-induced protein 1	18q21.32
PMS1	9121	PMS1 postmeiotic segregation increased 1 (S. cerevisiae)	2q31-q33
PMS2	9122	PMS2 postmeiotic segregation increased 2 (S. cerevisiae)	7p22.1
PNRC1	17278	proline-rich nuclear receptor coactivator 1	6q16.1
POLD1	9175	polymerase (DNA directed), delta 1, catalytic subunit 125kDa	19q13.3
POLE	9177	polymerase (DNA directed), epsilon	12q24.3
PPM1D	9277	protein phosphatase, Mg2+/Mn2+ dependent, 1D	17q23.3
PPP2R1A	9302	protein phosphatase 2, regulatory subunit A, alpha	19q13
PPP6C	9323	protein phosphatase 6, catalytic subunit	9q33.3
PRDM1	9346	PR domain containing 1, with ZNF domain	6q21
PRKAR1A	9388	protein kinase, cAMP-dependent, regulatory, type I, alpha (tissue specific extinguisher 1)	17q23-q24
PTCH1	9585	patched 1	9q22.1-q31
PTEN	9588	phosphatase and tensin homolog	10q23
PTPN11	9644	protein tyrosine phosphatase, non-receptor type 11	12q24.1
PTPRD	9668	protein tyrosine phosphatase, receptor type, D	9p24.1-p23
PTPRS	9681	protein tyrosine phosphatase, receptor type, S	19p13.3
PTPRT	9682	protein tyrosine phosphatase, receptor type, T	20q12-q13
RAB35	9774	RAB35, member RAS oncogene family	12q24
RAC1	9801	ras-related C3 botulinum toxin substrate 1 (rho family, small GTP binding protein Rac1)	7p22
RAD21	9811	RAD21 homolog (S. pombe)	8q24
RAD50	9816	RAD50 homolog (S. cerevisiae)	5q23-q31
RAD51	9817	RAD51 homolog (RecA homolog, E. coli) (S. cerevisiae)	15q15.1
RAD51B	9822	RAD51-like 1 (S. cerevisiae)	14q23-q24.2
RAD51C	9820	RAD51 homolog C (S. cerevisiae)	17q25.1
RAD51D	9823	RAD51-like 3 (S. cerevisiae)	17q11
RAD52	9824	RAD52 homolog (S. cerevisiae)	12p13-p12.2
RAD54L	9826	RAD54-like (S. cerevisiae)	1p32
RAF1	9829	v-raf-1 murine leukemia viral oncogene homolog 1	3p25
RARA	9864	retinoic acid receptor, alpha	17q21.1
RASA1	9871	RAS p21 protein activator (GTPase activating protein) 1	5q13
RB1	9884	retinoblastoma 1	13q14.2
RBM10	9896	RNA binding motif protein 10	Xp11.3
RECQL4	9949	RecQ protein-like 4	8q24.3
REL	9954	v-rel reticuloendotheliosis viral oncogene homolog (avian)	2p13-p12
RET	9967	ret proto-oncogene	10q11.2
RFWD2	17440	ring finger and WD repeat domain 2	1q25.1-q25.2
RHEB	10011	Ras homolog enriched in brain	7q36
RHOA	667	ras homolog gene family, member A	3p21.3
RICTOR	28611	RPTOR independent companion of MTOR, complex 2	5p13.1
RIT1	10023	Ras-like without CAAX 1	1q21.2
RNF43	18505	ring finger protein 43	17q23.2
ROS1	10261	c-ros oncogene 1 , receptor tyrosine kinase	6q21-q22
RPS6KA4	10433	ribosomal protein S6 kinase, 90kDa, polypeptide 4	11q11-q13
RPS6KB2	10437	ribosomal protein S6 kinase, 70kDa, polypeptide 2	11q13.1
RPTOR	30287	regulatory associated protein of MTOR, complex 1	17q25.3
RUNX1	10471	runt-related transcription factor 1	21q22.3
RYBP	10480	RING1 and YY1 binding protein	3p14.2
SDHA	10680	succinate dehydrogenase complex, subunit A, flavoprotein (Fp)	5p15
SDHAF2	26034	succinate dehydrogenase complex assembly factor 2	11q12.2
SDHB	10681	succinate dehydrogenase complex, subunit B, iron sulfur (Ip)	1p36.1-p35
SDHC	10682	succinate dehydrogenase complex, subunit C, integral membrane protein, 15kDa	1q21
SDHD	10683	succinate dehydrogenase complex, subunit D, integral membrane protein	11q23
SETD2	18420	SET domain containing 2	3p21.31
SF3B1	10768	splicing factor 3b, subunit 1, 155kDa	2q33.1
SH2B3	29605	SH2B adaptor protein 3	12q24.12
SH2D1A	10820	SH2 domain containing 1A	Xq25
SHQ1	25543	SHQ1 homolog (S. cerevisiae)	3p13
SMAD2	6768	SMAD family member 2	18q21
SMAD3	6769	SMAD family member 3	15q21-q22
SMAD4	6770	SMAD family member 4	18q21.1
SMARCA4	11100	SWI/SNF related, matrix associated, actin dependent regulator of chromatin, subfamily a, member 4	19p13.3
SMARCB1	11103	SWI/SNF related, matrix associated, actin dependent regulator of chromatin, subfamily b, member 1	22q11.23
SMARCD1	11106	SWI/SNF related, matrix associated, actin dependent regulator of chromatin, subfamily d, member 1	12q13-q14
SMO	11119	smoothened homolog (Drosophila)	7q32.1
SOCS1	19383	suppressor of cytokine signaling 1	16p13.13
SOX17	18122	SRY (sex determining region Y)-box 17	8q11.23
SOX2	11195	SRY (sex determining region Y)-box 2	3q26.3-q27
SOX9	11204	SRY (sex determining region Y)-box 9	17q23
SPEN	17575	spen homolog, transcriptional regulator (Drosophila)	1p36
SPOP	11254	speckle-type POZ protein	17q21.33
SRC	11283	v-src sarcoma (Schmidt-Ruppin A-2) viral oncogene homolog (avian)	20q12-q13
SRSF2	10783	serine/arginine-rich splicing factor 2	17q25.2
STAG2	11355	stromal antigen 2	Xq25
STAT3	11364	signal transducer and activator of transcription 3 (acute-phase response factor)	17q21
STAT5A	11366	signal transducer and activator of transcription 5A	17q11.2
STAT5B	11367	signal transducer and activator of transcription 5B	17q11.2
STK11	11389	serine/threonine kinase 11	19p13.3
STK40	21373	serine/threonine kinase 40	1p34.3
SUFU	16466	suppressor of fused homolog (Drosophila)	10q24.32
SUZ12	17101	suppressor of zeste 12 homolog (Drosophila)	17q21
SYK	11491	spleen tyrosine kinase	9q22
TBX3	11602	T-box 3	12q24.1
TCEB1	11617	transcription elongation factor B (SIII), polypeptide 1 (15kDa, elongin C)	8q13.3
TCF3	11633	transcription factor 3 (E2A immunoglobulin enhancer binding factors E12/E47)	19p13.3
TCF7L2	11641	transcription factor 7-like 2 (T-cell specific, HMG-box)	10q25.3
TERT	11730	telomerase reverse transcriptase	5p15.33
TET1	29484	tet oncogene 1	10q21
TET2	25941	tet oncogene family member 2	4q24
TGFBR1	11772	transforming growth factor, beta receptor 1	9q22
TGFBR2	11773	transforming growth factor, beta receptor II (70/80kDa)	3p22
TMEM127	26038	transmembrane protein 127	2q11.2
TMPRSS2	11876	transmembrane protease, serine 2	21q22.3
TNFAIP3	11896	tumor necrosis factor, alpha-induced protein 3	6q23-q25
TNFRSF14	11912	tumor necrosis factor receptor superfamily, member 14 (herpesvirus entry mediator)	1p36.32
TOP1	11986	topoisomerase (DNA) I	20q12-q13.1
TP53	11998	tumor protein p53	17p13.1
TP63	15979	tumor protein p63	3q27-q29
TRAF2	12032	TNF receptor-associated factor 2	9q34
TRAF7	20456	TNF receptor-associated factor 7	16p13.3
TSC1	12362	tuberous sclerosis 1	9q34
TSC2	12363	tuberous sclerosis 2	16p13.3
TSHR	12373	thyroid stimulating hormone receptor	14q24-q31
U2AF1	12453	U2 small nuclear RNA auxiliary factor 1	21q22.3
VEGFA	12680	vascular endothelial growth factor A	6p12
VHL	12687	von Hippel-Lindau tumor suppressor	3p25.3
VTCN1	28873	V-set domain containing T cell activation inhibitor 1	1p12
WT1	12796	Wilms tumor 1	11p13
XIAP	592	X-linked inhibitor of apoptosis	Xq25
XPO1	12825	exportin 1 (CRM1 homolog, yeast)	2p15
XRCC2	12829	X-ray repair complementing defective repair in Chinese hamster cells 2	7q36
YAP1	16262	Yes-associated protein 1	11q13
YES1	12841	v-yes-1 Yamaguchi sarcoma viral oncogene homolog 1	18p11.31-p11.21
ZFHX3	777	zinc finger homeobox 3	16q22.3
ZRSR2	23019	zinc finger (CCCH type), RNA-binding motif and serine/arginine rich 2	Xp22.1

## Sheet: IMPACT468
Approved Symbol	Approved Name	Num Distinct Exons	First Design
ABL1	c-abl oncogene 1, non-receptor tyrosine kinase	12	IMPACT-341
ACVR1	activin A receptor, type I	9	IMPACT-410
AGO2	eukaryotic translation initiation factor 2C, 2	19	IMPACT-468
AKT1	v-akt murine thymoma viral oncogene homolog 1	13	IMPACT-341
AKT2	v-akt murine thymoma viral oncogene homolog 2	13	IMPACT-341
AKT3	v-akt murine thymoma viral oncogene homolog 3 (protein kinase B, gamma)	14	IMPACT-341
ALK	anaplastic lymphoma receptor tyrosine kinase	29	IMPACT-341
ALOX12B	arachidonate 12-lipoxygenase, 12R type	15	IMPACT-341
ANKRD11	ankyrin repeat domain 11	12	IMPACT-410
APC	adenomatous polyposis coli	16	IMPACT-341
AR	androgen receptor	11	IMPACT-341
ARAF	v-raf murine sarcoma 3611 viral oncogene homolog	15	IMPACT-341
ARID1A	AT rich interactive domain 1A (SWI-like)	20	IMPACT-341
ARID1B	AT rich interactive domain 1B (SWI1-like)	21	IMPACT-341
ARID2	AT rich interactive domain 2 (ARID, RFX-like)	22	IMPACT-341
ARID5B	AT rich interactive domain 5B (MRF1-like)	11	IMPACT-341
ASXL1	additional sex combs like 1 (Drosophila)	14	IMPACT-341
ASXL2	additional sex combs like 2 (Drosophila)	12	IMPACT-341
ATM	ataxia telangiectasia mutated	62	IMPACT-341
ATR	ataxia telangiectasia and Rad3 related	47	IMPACT-341
ATRX	alpha thalassemia/mental retardation syndrome X-linked	35	IMPACT-341
AURKA	aurora kinase A	8	IMPACT-341
AURKB	aurora kinase B	8	IMPACT-341
AXIN1	axin 1	10	IMPACT-341
AXIN2	axin 2	10	IMPACT-341
AXL	AXL receptor tyrosine kinase	20	IMPACT-341
B2M	beta-2-microglobulin	3	IMPACT-341
BABAM1	chromosome 19 open reading frame 62	8	IMPACT-468
BAP1	BRCA1 associated protein-1 (ubiquitin carboxy-terminal hydrolase)	17	IMPACT-341
BARD1	BRCA1 associated RING domain 1	11	IMPACT-341
BBC3	BCL2 binding component 3	4	IMPACT-341
BCL10	B-cell CLL/lymphoma 10	3	IMPACT-410
BCL2	B-cell CLL/lymphoma 2	2	IMPACT-341
BCL2L1	BCL2-like 1	2	IMPACT-341
BCL2L11	BCL2-like 11 (apoptosis facilitator)	10	IMPACT-341
BCL6	B-cell CLL/lymphoma 6	8	IMPACT-341
BCOR	BCL6 corepressor	14	IMPACT-341
BIRC3	baculoviral IAP repeat-containing 3	8	IMPACT-410
BLM	Bloom syndrome, RecQ helicase-like	21	IMPACT-341
BMPR1A	bone morphogenetic protein receptor, type IA	11	IMPACT-341
BRAF	v-raf murine sarcoma viral oncogene homolog B1	18	IMPACT-341
BRCA1	breast cancer 1, early onset	23	IMPACT-341
BRCA2	breast cancer 2, early onset	26	IMPACT-341
BRD4	bromodomain containing 4	21	IMPACT-341
BRIP1	BRCA1 interacting protein C-terminal helicase 1	19	IMPACT-341
BTK	Bruton agammaglobulinemia tyrosine kinase	19	IMPACT-341
CALR	calreticulin	9	IMPACT-410
CARD11	caspase recruitment domain family, member 11	24	IMPACT-341
CARM1	coactivator-associated arginine methyltransferase 1	16	IMPACT-468
CASP8	caspase 8, apoptosis-related cysteine peptidase	11	IMPACT-341
CBFB	core-binding factor, beta subunit	6	IMPACT-341
CBL	Cas-Br-M (murine) ecotropic retroviral transforming sequence	16	IMPACT-341
CCND1	cyclin D1	5	IMPACT-341
CCND2	cyclin D2	5	IMPACT-341
CCND3	cyclin D3	6	IMPACT-341
CCNE1	cyclin E1	11	IMPACT-341
CD274	CD274 molecule	6	IMPACT-341
CD276	CD276 molecule	9	IMPACT-341
CD79A	CD79a molecule, immunoglobulin-associated alpha	5	IMPACT-410
CD79B	CD79b molecule, immunoglobulin-associated beta	6	IMPACT-341
CDC42	cell division cycle 42 (GTP binding protein, 25kDa)	6	IMPACT-468
CDC73	cell division cycle 73, Paf1/RNA polymerase II complex component, homolog (S. cerevisiae)	17	IMPACT-341
CDH1	cadherin 1, type 1, E-cadherin (epithelial)	16	IMPACT-341
CDK12	cyclin-dependent kinase 12	14	IMPACT-341
CDK4	cyclin-dependent kinase 4	7	IMPACT-341
CDK6	cyclin-dependent kinase 6	7	IMPACT-341
CDK8	cyclin-dependent kinase 8	13	IMPACT-341
CDKN1A	cyclin-dependent kinase inhibitor 1A (p21, Cip1)	3	IMPACT-341
CDKN1B	cyclin-dependent kinase inhibitor 1B (p27, Kip1)	2	IMPACT-341
CDKN2A	cyclin-dependent kinase inhibitor 2A (melanoma, p16, inhibits CDK4)	5	IMPACT-341
CDKN2B	cyclin-dependent kinase inhibitor 2B (p15, inhibits CDK4)	2	IMPACT-341
CDKN2C	cyclin-dependent kinase inhibitor 2C (p18, inhibits CDK4)	2	IMPACT-341
CEBPA	CCAAT/enhancer binding protein (C/EBP), alpha	1	IMPACT-410
CENPA	centromere protein A	4	IMPACT-410
CHEK1	CHK1 checkpoint homolog (S. pombe)	12	IMPACT-341
CHEK2	CHK2 checkpoint homolog (S. pombe)	15	IMPACT-341
CIC	capicua homolog (Drosophila)	20	IMPACT-341
CREBBP	CREB binding protein	31	IMPACT-341
CRKL	v-crk sarcoma virus CT10 oncogene homolog (avian)-like	3	IMPACT-341
CRLF2	cytokine receptor-like factor 2	6	IMPACT-341
CSDE1	cold shock domain containing E1, RNA-binding	19	IMPACT-468
CSF1R	colony stimulating factor 1 receptor	21	IMPACT-341
CSF3R	colony stimulating factor 3 receptor (granulocyte)	16	IMPACT-410
CTCF	CCCTC-binding factor (zinc finger protein)	10	IMPACT-341
CTLA4	cytotoxic T-lymphocyte-associated protein 4	4	IMPACT-341
CTNNB1	catenin (cadherin-associated protein), beta 1, 88kDa	14	IMPACT-341
CUL3	cullin 3	17	IMPACT-341
CXCR4	chemokine (C-X-C motif) receptor 4	2	IMPACT-410
CYLD	cylindromatosis (turban tumor syndrome)	17	IMPACT-468
CYSLTR2	cysteinyl leukotriene receptor 2	1	IMPACT-468
DAXX	death-domain associated protein	8	IMPACT-341
DCUN1D1	DCN1, defective in cullin neddylation 1, domain containing 1 (S. cerevisiae)	7	IMPACT-341
DDR2	discoidin domain receptor tyrosine kinase 2	16	IMPACT-341
DICER1	dicer 1, ribonuclease type III	26	IMPACT-341
DIS3	DIS3 mitotic control homolog (S. cerevisiae)	22	IMPACT-341
DNAJB1	DnaJ (Hsp40) homolog, subfamily B, member 1	3	IMPACT-410
DNMT1	DNA (cytosine-5-)-methyltransferase 1	41	IMPACT-341
DNMT3A	DNA (cytosine-5-)-methyltransferase 3 alpha	24	IMPACT-341
DNMT3B	DNA (cytosine-5-)-methyltransferase 3 beta	23	IMPACT-341
DOT1L	DOT1-like, histone H3 methyltransferase (S. cerevisiae)	29	IMPACT-341
DROSHA	drosha, ribonuclease type III	33	IMPACT-468
DUSP4	dual specificity phosphatase 4	5	IMPACT-468
E2F3	E2F transcription factor 3	8	IMPACT-341
EED	embryonic ectoderm development	13	IMPACT-341
EGFL7	EGF-like-domain, multiple 7	8	IMPACT-341
EGFR	epidermal growth factor receptor	30	IMPACT-341
EIF1AX	eukaryotic translation initiation factor 1A, X-linked	7	IMPACT-341
EIF4A2	eukaryotic translation initiation factor 4A2	11	IMPACT-410
EIF4E	eukaryotic translation initiation factor 4E	9	IMPACT-410
ELF3	E74-like factor 3 (ets domain transcription factor, epithelial-specific )	8	IMPACT-468
EP300	E1A binding protein p300	31	IMPACT-341
EPAS1	endothelial PAS domain protein 1	16	IMPACT-468
EPCAM	epithelial cell adhesion molecule	9	IMPACT-341
EPHA3	EPH receptor A3	17	IMPACT-341
EPHA5	EPH receptor A5	18	IMPACT-341
EPHA7	EPH receptor A7	17	IMPACT-410
EPHB1	EPH receptor B1	16	IMPACT-341
ERBB2	v-erb-b2 erythroblastic leukemia viral oncogene homolog 2, neuro/glioblastoma derived oncogene homolog (avian)	29	IMPACT-341
ERBB3	v-erb-b2 erythroblastic leukemia viral oncogene homolog 3 (avian)	28	IMPACT-341
ERBB4	v-erb-a erythroblastic leukemia viral oncogene homolog 4 (avian)	29	IMPACT-341
ERCC2	excision repair cross-complementing rodent repair deficiency, complementation group 2	24	IMPACT-341
ERCC3	excision repair cross-complementing rodent repair deficiency, complementation group 3 (xeroderma pigmentosum group B complementing)	15	IMPACT-341
ERCC4	excision repair cross-complementing rodent repair deficiency, complementation group 4	11	IMPACT-341
ERCC5	excision repair cross-complementing rodent repair deficiency, complementation group 5	15	IMPACT-341
ERF	Ets2 repressor factor	4	IMPACT-468
ERG	v-ets erythroblastosis virus E26 oncogene homolog (avian)	12	IMPACT-341
ERRFI1	ERBB receptor feedback inhibitor 1	3	IMPACT-410
ESR1	estrogen receptor 1	9	IMPACT-341
ETV1	ets variant 1	13	IMPACT-341
ETV6	ets variant 6	9	IMPACT-341
EZH1	enhancer of zeste homolog 1 (Drosophila)	19	IMPACT-468
EZH2	enhancer of zeste homolog 2 (Drosophila)	19	IMPACT-341
FAM123B	family with sequence similarity 123B	1	IMPACT-341
FAM175A	family with sequence similarity 175, member A	9	IMPACT-341
FAM46C	family with sequence similarity 46, member C	1	IMPACT-341
FAM58A	family with sequence similarity 58, member A	5	IMPACT-468
FANCA	Fanconi anemia, complementation group A	44	IMPACT-341
FANCC	Fanconi anemia, complementation group C	15	IMPACT-341
FAT1	FAT tumor suppressor homolog 1 (Drosophila)	26	IMPACT-341
FBXW7	F-box and WD repeat domain containing 7	14	IMPACT-341
FGF19	fibroblast growth factor 19	3	IMPACT-341
FGF3	fibroblast growth factor 3	3	IMPACT-341
FGF4	fibroblast growth factor 4	3	IMPACT-341
FGFR1	fibroblast growth factor receptor 1	19	IMPACT-341
FGFR2	fibroblast growth factor receptor 2	20	IMPACT-341
FGFR3	fibroblast growth factor receptor 3	19	IMPACT-341
FGFR4	fibroblast growth factor receptor 4	16	IMPACT-341
FH	fumarate hydratase	10	IMPACT-341
FLCN	folliculin	11	IMPACT-341
FLT1	fms-related tyrosine kinase 1 (vascular endothelial growth factor/vascular permeability factor receptor)	33	IMPACT-341
FLT3	fms-related tyrosine kinase 3	24	IMPACT-341
FLT4	fms-related tyrosine kinase 4	31	IMPACT-341
FOXA1	forkhead box A1	2	IMPACT-341
FOXL2	forkhead box L2	1	IMPACT-341
FOXO1	forkhead box O1	3	IMPACT-410
FOXP1	forkhead box P1	20	IMPACT-341
FUBP1	far upstream element (FUSE) binding protein 1	21	IMPACT-341
FYN	FYN oncogene related to SRC, FGR, YES	12	IMPACT-410
GATA1	GATA binding protein 1 (globin transcription factor 1)	5	IMPACT-341
GATA2	GATA binding protein 2	5	IMPACT-341
GATA3	GATA binding protein 3	5	IMPACT-341
GLI1	GLI family zinc finger 1	11	IMPACT-410
GNA11	guanine nucleotide binding protein (G protein), alpha 11 (Gq class)	7	IMPACT-341
GNAQ	guanine nucleotide binding protein (G protein), q polypeptide	7	IMPACT-341
GNAS	GNAS complex locus	15	IMPACT-341
GPS2	G protein pathway suppressor 2	10	IMPACT-410
GREM1	gremlin 1	1	IMPACT-341
GRIN2A	glutamate receptor, ionotropic, N-methyl D-aspartate 2A	12	IMPACT-341
GSK3B	glycogen synthase kinase 3 beta	12	IMPACT-341
H3F3A	H3 histone, family 3A	3	IMPACT-410
H3F3B	H3 histone, family 3B (H3.3B)	3	IMPACT-410
H3F3C	H3 histone, family 3C	1	IMPACT-341
HGF	hepatocyte growth factor (hepapoietin A; scatter factor)	19	IMPACT-341
HIST1H1C	histone cluster 1, H1c	1	IMPACT-341
HIST1H2BD	histone cluster 1, H2bd	1	IMPACT-341
HIST1H3A	histone cluster 1, H3a	1	IMPACT-410
HIST1H3B	histone cluster 1, H3b	1	IMPACT-341
HIST1H3C	histone cluster 1, H3c	1	IMPACT-410
HIST1H3D	histone cluster 1, H3d	1	IMPACT-410
HIST1H3E	histone cluster 1, H3e	1	IMPACT-410
HIST1H3F	histone cluster 1, H3f	3	IMPACT-410
HIST1H3G	histone cluster 1, H3g	1	IMPACT-410
HIST1H3H	histone cluster 1, H3h	1	IMPACT-410
HIST1H3I	histone cluster 1, H3i	1	IMPACT-410
HIST1H3J	histone cluster 1, H3j	1	IMPACT-410
HIST2H3C	histone cluster 2, H3c	2	IMPACT-410
HIST2H3D	histone cluster 2, H3d	1	IMPACT-410
HIST3H3	histone cluster 3, H3	1	IMPACT-410
HLA-A	major histocompatibility complex, class I, A	8	IMPACT-410
HLA-B	major histocompatibility complex, class I, B	7	IMPACT-468
HNF1A	HNF1 homeobox A	9	IMPACT-341
HOXB13	homeobox B13	2	IMPACT-410
HRAS	v-Ha-ras Harvey rat sarcoma viral oncogene homolog	5	IMPACT-341
ICOSLG	inducible T-cell co-stimulator ligand	7	IMPACT-341
ID3	inhibitor of DNA binding 3, dominant negative helix-loop-helix protein	2	IMPACT-410
IDH1	isocitrate dehydrogenase 1 (NADP+), soluble	8	IMPACT-341
IDH2	isocitrate dehydrogenase 2 (NADP+), mitochondrial	11	IMPACT-341
IFNGR1	interferon gamma receptor 1	9	IMPACT-341
IGF1	insulin-like growth factor 1 (somatomedin C)	6	IMPACT-341
IGF1R	insulin-like growth factor 1 receptor	21	IMPACT-341
IGF2	insulin-like growth factor 2 (somatomedin A)	4	IMPACT-341
IKBKE	inhibitor of kappa light polypeptide gene enhancer in B-cells, kinase epsilon	20	IMPACT-341
IKZF1	IKAROS family zinc finger 1 (Ikaros)	7	IMPACT-341
IL10	interleukin 10	5	IMPACT-341
IL7R	interleukin 7 receptor	8	IMPACT-341
INHA	inhibin, alpha	2	IMPACT-410
INHBA	inhibin, beta A	2	IMPACT-410
INPP4A	inositol polyphosphate-4-phosphatase, type I, 107kDa	25	IMPACT-341
INPP4B	inositol polyphosphate-4-phosphatase, type II, 105kDa	24	IMPACT-341
INPPL1	inositol polyphosphate phosphatase-like 1	28	IMPACT-468
INSR	insulin receptor	22	IMPACT-341
IRF4	interferon regulatory factor 4	9	IMPACT-341
IRS1	insulin receptor substrate 1	1	IMPACT-341
IRS2	insulin receptor substrate 2	2	IMPACT-341
JAK1	Janus kinase 1	24	IMPACT-341
JAK2	Janus kinase 2	23	IMPACT-341
JAK3	Janus kinase 3	24	IMPACT-341
JUN	jun proto-oncogene	1	IMPACT-341
KDM5A	lysine (K)-specific demethylase 5A	28	IMPACT-341
KDM5C	lysine (K)-specific demethylase 5C	27	IMPACT-341
KDM6A	lysine (K)-specific demethylase 6A	30	IMPACT-341
KDR	kinase insert domain receptor (a type III receptor tyrosine kinase)	30	IMPACT-341
KEAP1	kelch-like ECH-associated protein 1	5	IMPACT-341
KIT	v-kit Hardy-Zuckerman 4 feline sarcoma viral oncogene homolog	21	IMPACT-341
KLF4	Kruppel-like factor 4 (gut)	5	IMPACT-341
KMT2B	myeloid/lymphoid or mixed-lineage leukemia 4	38	IMPACT-468
KMT5A	SET domain containing (lysine methyltransferase) 8	8	IMPACT-468
KNSTRN	chromosome 15 open reading frame 23	10	IMPACT-468
KRAS	v-Ki-ras2 Kirsten rat sarcoma viral oncogene homolog	5	IMPACT-341
LATS1	LATS, large tumor suppressor, homolog 1 (Drosophila)	7	IMPACT-341
LATS2	LATS, large tumor suppressor, homolog 2 (Drosophila)	7	IMPACT-341
LMO1	LIM domain only 1 (rhombotin 1)	5	IMPACT-341
LYN	v-yes-1 Yamaguchi sarcoma viral related oncogene homolog	12	IMPACT-468
MALT1	mucosa associated lymphoid tissue lymphoma translocation gene 1	17	IMPACT-410
MAP2K1	mitogen-activated protein kinase kinase 1	12	IMPACT-341
MAP2K2	mitogen-activated protein kinase kinase 2	11	IMPACT-341
MAP2K4	mitogen-activated protein kinase kinase 4	13	IMPACT-341
MAP3K1	mitogen-activated protein kinase kinase kinase 1	20	IMPACT-341
MAP3K13	mitogen-activated protein kinase kinase kinase 13	15	IMPACT-341
MAP3K14	mitogen-activated protein kinase kinase kinase 14	16	IMPACT-410
MAPK1	mitogen-activated protein kinase 1	8	IMPACT-341
MAPK3	mitogen-activated protein kinase 3	8	IMPACT-410
MAPKAP1	mitogen-activated protein kinase associated protein 1	11	IMPACT-468
MAX	MYC associated factor X	10	IMPACT-341
MCL1	myeloid cell leukemia sequence 1 (BCL2-related)	3	IMPACT-341
MDC1	mediator of DNA-damage checkpoint 1	14	IMPACT-341
MDM2	Mdm2 p53 binding protein homolog (mouse)	11	IMPACT-341
MDM4	Mdm4 p53 binding protein homolog (mouse)	10	IMPACT-341
MED12	mediator complex subunit 12	45	IMPACT-341
MEF2B	myocyte enhancer factor 2B	8	IMPACT-341
MEN1	multiple endocrine neoplasia I	9	IMPACT-341
MET	met proto-oncogene (hepatocyte growth factor receptor)	20	IMPACT-341
MGA	MAX gene associated	23	IMPACT-410
MITF	microphthalmia-associated transcription factor	14	IMPACT-341
MLH1	mutL homolog 1, colon cancer, nonpolyposis type 2 (E. coli)	20	IMPACT-341
MLL	myeloid/lymphoid or mixed-lineage leukemia (trithorax homolog, Drosophila)	36	IMPACT-341
MLL2	myeloid/lymphoid or mixed-lineage leukemia 2	54	IMPACT-341
MLL3	myeloid/lymphoid or mixed-lineage leukemia 3	60	IMPACT-341
MPL	myeloproliferative leukemia virus oncogene	12	IMPACT-341
MRE11A	MRE11 meiotic recombination 11 homolog A (S. cerevisiae)	19	IMPACT-341
MSH2	mutS homolog 2, colon cancer, nonpolyposis type 1 (E. coli)	19	IMPACT-341
MSH3	mutS homolog 3 (E. coli)	24	IMPACT-468
MSH6	mutS homolog 6 (E. coli)	10	IMPACT-341
MSI1	musashi homolog 1 (Drosophila)	14	IMPACT-468
MSI2	musashi homolog 2 (Drosophila)	14	IMPACT-468
MST1	macrophage stimulating 1 (hepatocyte growth factor-like)	18	IMPACT-410
MST1R	macrophage stimulating 1 receptor (c-met-related tyrosine kinase)	20	IMPACT-410
MTOR	mechanistic target of rapamycin (serine/threonine kinase)	57	IMPACT-341
MUTYH	mutY homolog (E. coli)	16	IMPACT-341
MYC	v-myc myelocytomatosis viral oncogene homolog (avian)	3	IMPACT-341
MYCL1	v-myc myelocytomatosis viral oncogene homolog 1, lung carcinoma derived (avian)	3	IMPACT-341
MYCN	v-myc myelocytomatosis viral related oncogene, neuroblastoma derived (avian)	2	IMPACT-341
MYD88	myeloid differentiation primary response gene (88)	5	IMPACT-341
MYOD1	myogenic differentiation 1	3	IMPACT-341
NBN	nibrin	16	IMPACT-341
NCOA3	nuclear receptor coactivator 3	21	IMPACT-410
NCOR1	nuclear receptor corepressor 1	46	IMPACT-341
NEGR1	neuronal growth regulator 1	7	IMPACT-410
NF1	neurofibromin 1	59	IMPACT-341
NF2	neurofibromin 2 (merlin)	17	IMPACT-341
NFE2L2	nuclear factor (erythroid-derived 2)-like 2	5	IMPACT-341
NFKBIA	nuclear factor of kappa light polypeptide gene enhancer in B-cells inhibitor, alpha	6	IMPACT-410
NKX2-1	NK2 homeobox 1	3	IMPACT-341
NKX3-1	NK3 homeobox 1	2	IMPACT-341
NOTCH1	notch 1	34	IMPACT-341
NOTCH2	notch 2	34	IMPACT-341
NOTCH3	notch 3	33	IMPACT-341
NOTCH4	notch 4	30	IMPACT-341
NPM1	nucleophosmin (nucleolar phosphoprotein B23, numatrin)	12	IMPACT-341
NRAS	neuroblastoma RAS viral (v-ras) oncogene homolog	4	IMPACT-341
NSD1	nuclear receptor binding SET domain protein 1	22	IMPACT-341
NTHL1	nth endonuclease III-like 1 (E. coli)	6	IMPACT-468
NTRK1	neurotrophic tyrosine kinase, receptor, type 1	19	IMPACT-341
NTRK2	neurotrophic tyrosine kinase, receptor, type 2	20	IMPACT-341
NTRK3	neurotrophic tyrosine kinase, receptor, type 3	21	IMPACT-341
NUF2	NUF2, NDC80 kinetochore complex component, homolog (S. cerevisiae)	13	IMPACT-468
NUP93	nucleoporin 93kDa	21	IMPACT-410
PAK1	p21 protein (Cdc42/Rac)-activated kinase 1	16	IMPACT-341
PAK7	p21 protein (Cdc42/Rac)-activated kinase 7	8	IMPACT-341
PALB2	partner and localizer of BRCA2	13	IMPACT-341
PARK2	parkinson protein 2, E3 ubiquitin protein ligase (parkin)	16	IMPACT-341
PARP1	poly (ADP-ribose) polymerase 1	23	IMPACT-341
PAX5	paired box 5	11	IMPACT-341
PBRM1	polybromo 1	31	IMPACT-341
PDCD1	programmed cell death 1	5	IMPACT-341
PDCD1LG2	programmed cell death 1 ligand 2	6	IMPACT-468
PDGFRA	platelet-derived growth factor receptor, alpha polypeptide	34	IMPACT-341
PDGFRB	platelet-derived growth factor receptor, beta polypeptide	22	IMPACT-341
PDPK1	3-phosphoinositide dependent protein kinase-1	23	IMPACT-341
PGR	progesterone receptor	8	IMPACT-410
PHOX2B	paired-like homeobox 2b	3	IMPACT-341
PIK3C2G	phosphoinositide-3-kinase, class 2, gamma polypeptide	32	IMPACT-341
PIK3C3	phosphoinositide-3-kinase, class 3	25	IMPACT-341
PIK3CA	phosphoinositide-3-kinase, catalytic, alpha polypeptide	20	IMPACT-341
PIK3CB	phosphoinositide-3-kinase, catalytic, beta polypeptide	22	IMPACT-341
PIK3CD	phosphoinositide-3-kinase, catalytic, delta polypeptide	22	IMPACT-341
PIK3CG	phosphoinositide-3-kinase, catalytic, gamma polypeptide	10	IMPACT-341
PIK3R1	phosphoinositide-3-kinase, regulatory subunit 1 (alpha)	17	IMPACT-341
PIK3R2	phosphoinositide-3-kinase, regulatory subunit 2 (beta)	15	IMPACT-341
PIK3R3	phosphoinositide-3-kinase, regulatory subunit 3 (gamma)	12	IMPACT-341
PIM1	pim-1 oncogene	7	IMPACT-341
PLCG2	phospholipase C, gamma 2 (phosphatidylinositol-specific)	32	IMPACT-410
PLK2	polo-like kinase 2	14	IMPACT-341
PMAIP1	phorbol-12-myristate-13-acetate-induced protein 1	2	IMPACT-341
PMS1	PMS1 postmeiotic segregation increased 1 (S. cerevisiae)	13	IMPACT-341
PMS2	PMS2 postmeiotic segregation increased 2 (S. cerevisiae)	15	IMPACT-341
PNRC1	proline-rich nuclear receptor coactivator 1	2	IMPACT-341
POLD1	polymerase (DNA directed), delta 1, catalytic subunit 125kDa	26	IMPACT-410
POLE	polymerase (DNA directed), epsilon	49	IMPACT-341
PPARG	peroxisome proliferator-activated receptor gamma	7	IMPACT-468
PPM1D	protein phosphatase, Mg2+/Mn2+ dependent, 1D	6	IMPACT-410
PPP2R1A	protein phosphatase 2, regulatory subunit A, alpha	15	IMPACT-341
PPP4R2	protein phosphatase 4, regulatory subunit 2	9	IMPACT-468
PPP6C	protein phosphatase 6, catalytic subunit	8	IMPACT-410
PRDM1	PR domain containing 1, with ZNF domain	8	IMPACT-341
PRDM14	PR domain containing 14	7	IMPACT-468
PREX2	phosphatidylinositol-3,4,5-trisphosphate-dependent Rac exchange factor 2	41	IMPACT-468
PRKAR1A	protein kinase, cAMP-dependent, regulatory, type I, alpha (tissue specific extinguisher 1)	11	IMPACT-341
PRKCI	protein kinase C, iota	18	IMPACT-468
PRKD1	protein kinase D1	18	IMPACT-468
PTCH1	patched 1	25	IMPACT-341
PTEN	phosphatase and tensin homolog	9	IMPACT-341
PTP4A1	protein tyrosine phosphatase type IVA, member 1	5	IMPACT-468
PTPN11	protein tyrosine phosphatase, non-receptor type 11	15	IMPACT-341
PTPRD	protein tyrosine phosphatase, receptor type, D	37	IMPACT-341
PTPRS	protein tyrosine phosphatase, receptor type, S	39	IMPACT-341
PTPRT	protein tyrosine phosphatase, receptor type, T	32	IMPACT-341
RAB35	RAB35, member RAS oncogene family	6	IMPACT-410
RAC1	ras-related C3 botulinum toxin substrate 1 (rho family, small GTP binding protein Rac1)	7	IMPACT-341
RAC2	ras-related C3 botulinum toxin substrate 2 (rho family, small GTP binding protein Rac2)	6	IMPACT-468
RAD21	RAD21 homolog (S. pombe)	13	IMPACT-410
RAD50	RAD50 homolog (S. cerevisiae)	25	IMPACT-341
RAD51	RAD51 homolog (RecA homolog, E. coli) (S. cerevisiae)	10	IMPACT-341
RAD51C	RAD51 homolog C (S. cerevisiae)	9	IMPACT-341
RAD51L1	RAD51-like 1 (S. cerevisiae)	13	IMPACT-341
RAD51L3	RAD51-like 3 (S. cerevisiae)	11	IMPACT-341
RAD52	RAD52 homolog (S. cerevisiae)	11	IMPACT-341
RAD54L	RAD54-like (S. cerevisiae)	18	IMPACT-341
RAF1	v-raf-1 murine leukemia viral oncogene homolog 1	16	IMPACT-341
RARA	retinoic acid receptor, alpha	11	IMPACT-341
RASA1	RAS p21 protein activator (GTPase activating protein) 1	28	IMPACT-341
RB1	retinoblastoma 1	27	IMPACT-341
RBM10	RNA binding motif protein 10	24	IMPACT-341
RECQL	RecQ protein-like (DNA helicase Q1-like)	14	IMPACT-468
RECQL4	RecQ protein-like 4	22	IMPACT-341
REL	v-rel reticuloendotheliosis viral oncogene homolog (avian)	11	IMPACT-341
RET	ret proto-oncogene	20	IMPACT-341
RFWD2	ring finger and WD repeat domain 2	21	IMPACT-341
RHEB	Ras homolog enriched in brain	8	IMPACT-410
RHOA	ras homolog gene family, member A	4	IMPACT-341
RICTOR	RPTOR independent companion of MTOR, complex 2	39	IMPACT-341
RIT1	Ras-like without CAAX 1	6	IMPACT-341
RNF43	ring finger protein 43	9	IMPACT-341
ROS1	c-ros oncogene 1 , receptor tyrosine kinase	43	IMPACT-341
RPS6KA4	ribosomal protein S6 kinase, 90kDa, polypeptide 4	17	IMPACT-341
RPS6KB2	ribosomal protein S6 kinase, 70kDa, polypeptide 2	15	IMPACT-341
RPTOR	regulatory associated protein of MTOR, complex 1	34	IMPACT-341
RRAGC	Ras-related GTP binding C	7	IMPACT-468
RRAS	related RAS viral (r-ras) oncogene homolog	6	IMPACT-468
RRAS2	related RAS viral (r-ras) oncogene homolog 2	7	IMPACT-468
RTEL1	regulator of telomere elongation helicase 1	34	IMPACT-468
RUNX1	runt-related transcription factor 1	9	IMPACT-341
RXRA	retinoid X receptor, alpha	10	IMPACT-468
RYBP	RING1 and YY1 binding protein	4	IMPACT-341
SDHA	succinate dehydrogenase complex, subunit A, flavoprotein (Fp)	15	IMPACT-341
SDHAF2	succinate dehydrogenase complex assembly factor 2	4	IMPACT-341
SDHB	succinate dehydrogenase complex, subunit B, iron sulfur (Ip)	8	IMPACT-341
SDHC	succinate dehydrogenase complex, subunit C, integral membrane protein, 15kDa	7	IMPACT-341
SDHD	succinate dehydrogenase complex, subunit D, integral membrane protein	6	IMPACT-341
SESN1	sestrin 1	11	IMPACT-468
SESN2	sestrin 2	10	IMPACT-468
SESN3	sestrin 3	10	IMPACT-468
SETD2	SET domain containing 2	22	IMPACT-341
SF3B1	splicing factor 3b, subunit 1, 155kDa	26	IMPACT-341
SH2B3	SH2B adaptor protein 3	8	IMPACT-410
SH2D1A	SH2 domain containing 1A	4	IMPACT-341
SHOC2	soc-2 suppressor of clear homolog (C. elegans)	8	IMPACT-468
SHQ1	SHQ1 homolog (S. cerevisiae)	11	IMPACT-341
SLX4	SLX4 structure-specific endonuclease subunit homolog (S. cerevisiae)	14	IMPACT-468
SMAD2	SMAD family member 2	10	IMPACT-341
SMAD3	SMAD family member 3	10	IMPACT-341
SMAD4	SMAD family member 4	11	IMPACT-341
SMARCA4	SWI/SNF related, matrix associated, actin dependent regulator of chromatin, subfamily a, member 4	35	IMPACT-341
SMARCB1	SWI/SNF related, matrix associated, actin dependent regulator of chromatin, subfamily b, member 1	10	IMPACT-341
SMARCD1	SWI/SNF related, matrix associated, actin dependent regulator of chromatin, subfamily d, member 1	13	IMPACT-341
SMO	smoothened homolog (Drosophila)	12	IMPACT-341
SMYD3	SET and MYND domain containing 3	12	IMPACT-468
SOCS1	suppressor of cytokine signaling 1	1	IMPACT-341
SOS1	son of sevenless homolog 1 (Drosophila)	23	IMPACT-468
SOX17	SRY (sex determining region Y)-box 17	2	IMPACT-341
SOX2	SRY (sex determining region Y)-box 2	1	IMPACT-341
SOX9	SRY (sex determining region Y)-box 9	3	IMPACT-341
SPEN	spen homolog, transcriptional regulator (Drosophila)	16	IMPACT-341
SPOP	speckle-type POZ protein	9	IMPACT-341
SPRED1	sprouty-related, EVH1 domain containing 1	7	IMPACT-468
SRC	v-src sarcoma (Schmidt-Ruppin A-2) viral oncogene homolog (avian)	11	IMPACT-341
SRSF2	serine/arginine-rich splicing factor 2	2	IMPACT-410
STAG2	stromal antigen 2	33	IMPACT-341
STAT3	signal transducer and activator of transcription 3 (acute-phase response factor)	23	IMPACT-410
STAT5A	signal transducer and activator of transcription 5A	18	IMPACT-410
STAT5B	signal transducer and activator of transcription 5B	18	IMPACT-410
STK11	serine/threonine kinase 11	9	IMPACT-341
STK19	serine/threonine kinase 19	9	IMPACT-468
STK40	serine/threonine kinase 40	10	IMPACT-341
SUFU	suppressor of fused homolog (Drosophila)	13	IMPACT-341
SUZ12	suppressor of zeste 12 homolog (Drosophila)	16	IMPACT-341
SYK	spleen tyrosine kinase	13	IMPACT-341
TAP1	transporter 1, ATP-binding cassette, sub-family B (MDR/TAP)	11	IMPACT-468
TAP2	transporter 2, ATP-binding cassette, sub-family B (MDR/TAP)	16	IMPACT-468
TBX3	T-box 3	8	IMPACT-341
TCEB1	transcription elongation factor B (SIII), polypeptide 1 (15kDa, elongin C)	3	IMPACT-410
TCF3	transcription factor 3 (E2A immunoglobulin enhancer binding factors E12/E47)	19	IMPACT-410
TCF7L2	transcription factor 7-like 2 (T-cell specific, HMG-box)	20	IMPACT-410
TEK	TEK tyrosine kinase, endothelial	23	IMPACT-468
TERT	telomerase reverse transcriptase	16	IMPACT-341
TET1	tet oncogene 1	11	IMPACT-341
TET2	tet oncogene family member 2	10	IMPACT-341
TGFBR1	transforming growth factor, beta receptor 1	9	IMPACT-341
TGFBR2	transforming growth factor, beta receptor II (70/80kDa)	8	IMPACT-341
TMEM127	transmembrane protein 127	3	IMPACT-341
TMPRSS2	transmembrane protease, serine 2	14	IMPACT-341
TNFAIP3	tumor necrosis factor, alpha-induced protein 3	8	IMPACT-341
TNFRSF14	tumor necrosis factor receptor superfamily, member 14 (herpesvirus entry mediator)	9	IMPACT-341
TOP1	topoisomerase (DNA) I	21	IMPACT-341
TP53	tumor protein p53	16	IMPACT-341
TP53BP1	tumor protein p53 binding protein 1	28	IMPACT-468
TP63	tumor protein p63	16	IMPACT-341
TRAF2	TNF receptor-associated factor 2	10	IMPACT-410
TRAF7	TNF receptor-associated factor 7	20	IMPACT-341
TSC1	tuberous sclerosis 1	21	IMPACT-341
TSC2	tuberous sclerosis 2	41	IMPACT-341
TSHR	thyroid stimulating hormone receptor	11	IMPACT-341
U2AF1	U2 small nuclear RNA auxiliary factor 1	9	IMPACT-341
UPF1	UPF1 regulator of nonsense transcripts homolog (yeast)	23	IMPACT-468
VEGFA	vascular endothelial growth factor A	9	IMPACT-410
VHL	von Hippel-Lindau tumor suppressor	3	IMPACT-341
VTCN1	V-set domain containing T cell activation inhibitor 1	5	IMPACT-341
WHSC1	Wolf-Hirschhorn syndrome candidate 1	22	IMPACT-468
WHSC1L1	Wolf-Hirschhorn syndrome candidate 1-like 1	24	IMPACT-468
WT1	Wilms tumor 1	11	IMPACT-341
WWTR1	WW domain containing transcription regulator 1	6	IMPACT-468
XIAP	X-linked inhibitor of apoptosis	6	IMPACT-341
XPO1	exportin 1 (CRM1 homolog, yeast)	24	IMPACT-341
XRCC2	X-ray repair complementing defective repair in Chinese hamster cells 2	3	IMPACT-410
YAP1	Yes-associated protein 1	9	IMPACT-341
YES1	v-yes-1 Yamaguchi sarcoma viral oncogene homolog 1	11	IMPACT-341
ZFHX3	zinc finger homeobox 3	9	IMPACT-410
ZRSR2	zinc finger (CCCH type), RNA-binding motif and serine/arginine rich 2	11	IMPACT-410
