# Supplementary material for: Prospective Genotyping of Hepatocellular Carcinoma: Clinical Implications of Next-Generation Sequencing for Matching Patients to Targeted and Immune Therapies
Source: Oxford University Press journal article supplement (doi:10.1158/1078-0432.ccr-18-2293), 2018-10-29
Supplement: 10780432ccr182293-sup-205450_2_supp_5095904_pgm7rg.xlsx [file 10780432ccr182293-sup-205450_2_supp_5095904_pgm7rg.xlsx]

## Sheet: Comparison of MSK to TCGA 
Supplement Table 2: Comprison of Frequency of Alter Genes between MSK and TCGA cohort
Genes	TCGA (# altered)	MSK (# altered)	p value
					TCGA (N=196)
TERT (promoter)	87	68	0.112		MSK(N=127)
TP53	65	42	1
CTNNB1	51	45	0.081
RB1	25	7	0.036
ARID1A	23	17	0.73
BAP1	11	7	0.811
NFE2L2	11	8	0.812
PIK3CA	11	3	0.2627
AXIN1	10	10	0.4832
CDKN2A	9	7	0.794
ARID2	9	6	1
APC	8	7	0.594
SF3B1	8	7	0.5944
KEAP1	8	1	0.09
SMARCA4	8	5	1
HIST1HIC	3	0	0.283
NRAS	1	1	1
p-value calculated using two-tailed Fisher's exact test
